# Supplementary material
Source: publisher site journal article supplement (https://www.dovepress.com/article/supplementary_file/598204/598204%20Supplementary%20Materials.docx)
Supplement: Supplementary file 1 [file 598204%20Supplementary%20Materials.docx]

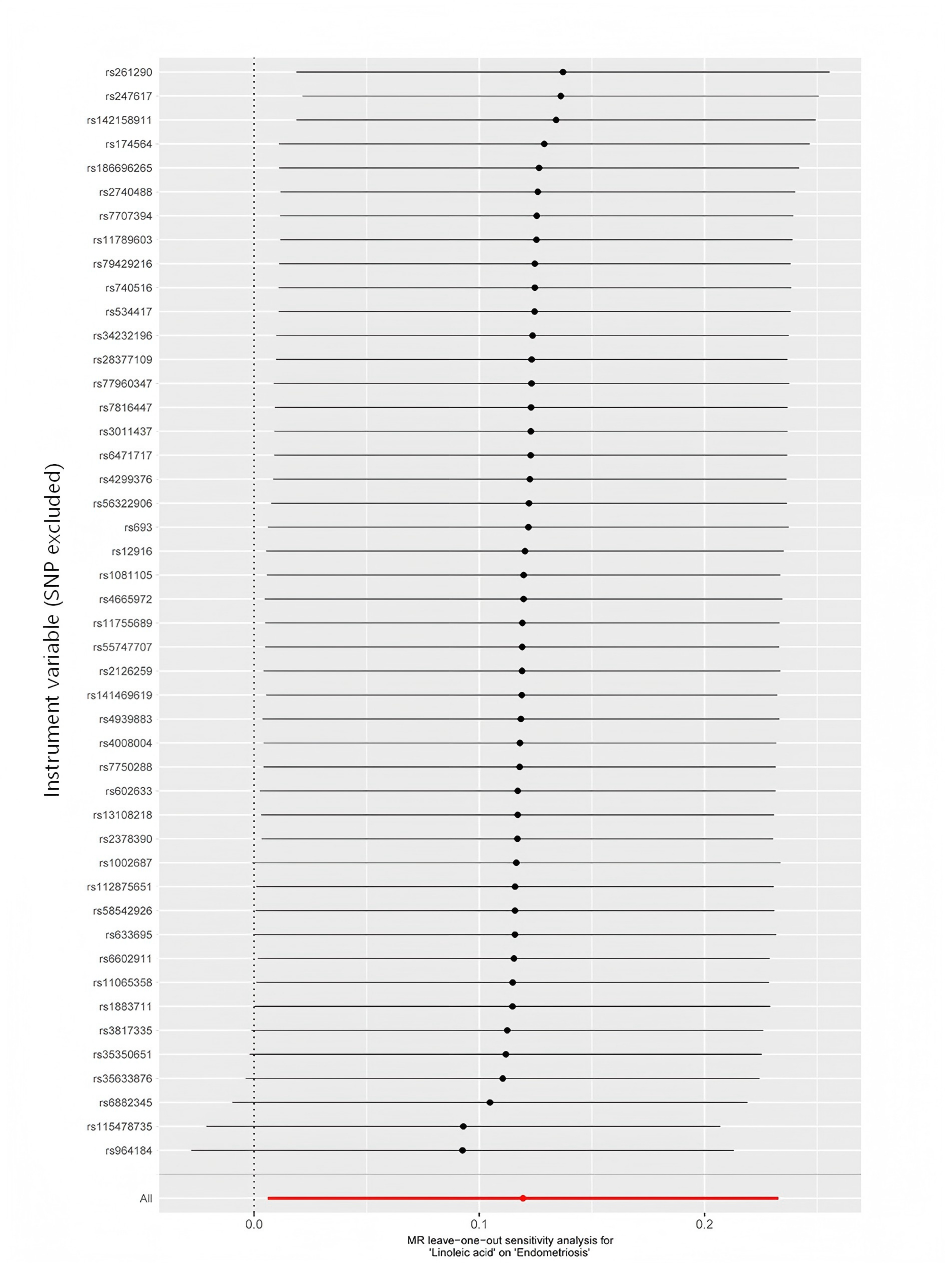


Figure S1. MR leave-one-out sensitivity analysis of linoleic acid to Endometriosis.

Each black dot represents the pooled causal estimate (IVW method) after removing one SNP, with horizontal lines indicating 95% confidence intervals. The red line ("All") denotes the overall causal estimate using all instrumental variables. The dashed vertical line at 0 indicates no effect.


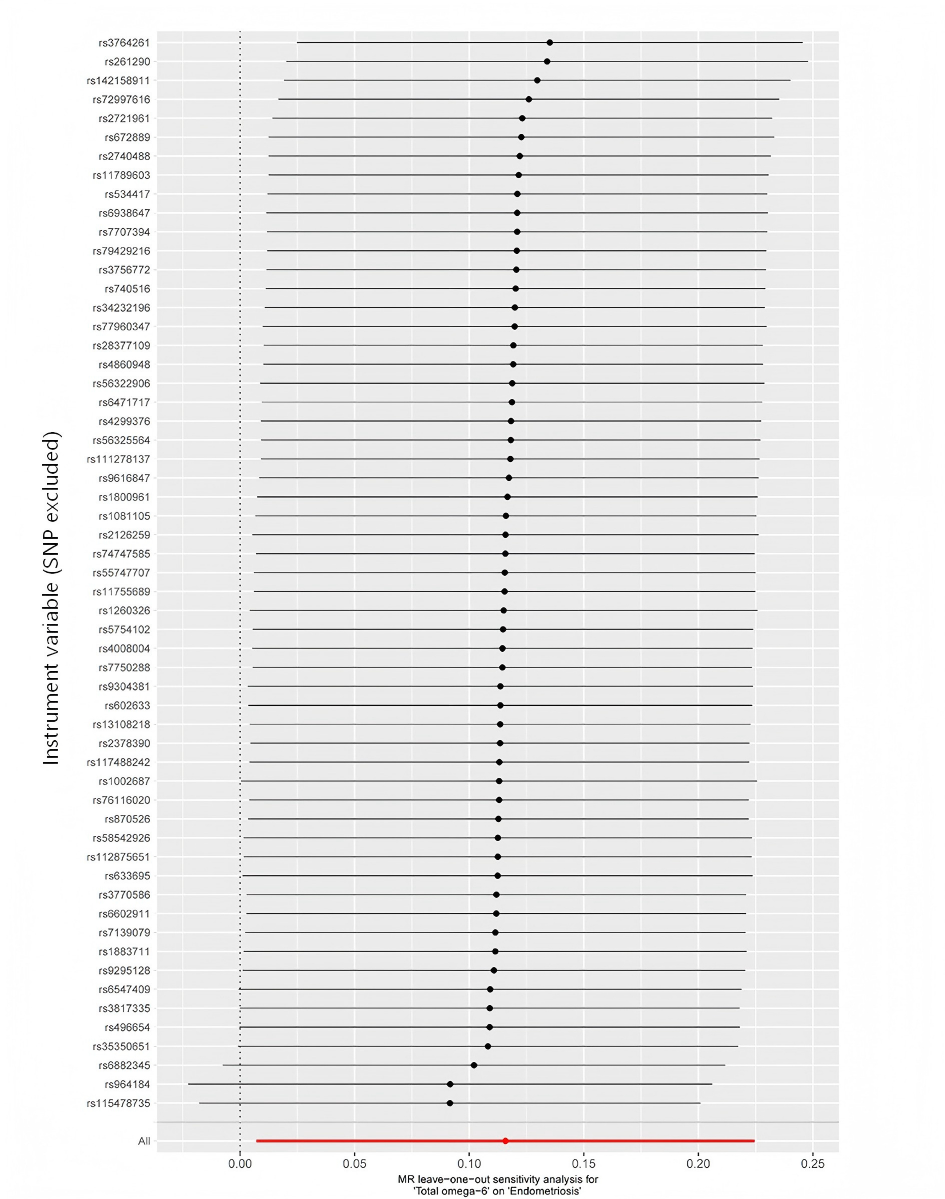


Figure S2. MR leave-one-out sensitivity analysis of Total Omega-6 to Endometriosis
Each black dot represents the pooled causal estimate (IVW method) after removing one SNP, with horizontal lines indicating 95% confidence intervals. The red line ("All") denotes the overall causal estimate using all instrumental variables. The dashed vertical line at 0 indicates no effect.


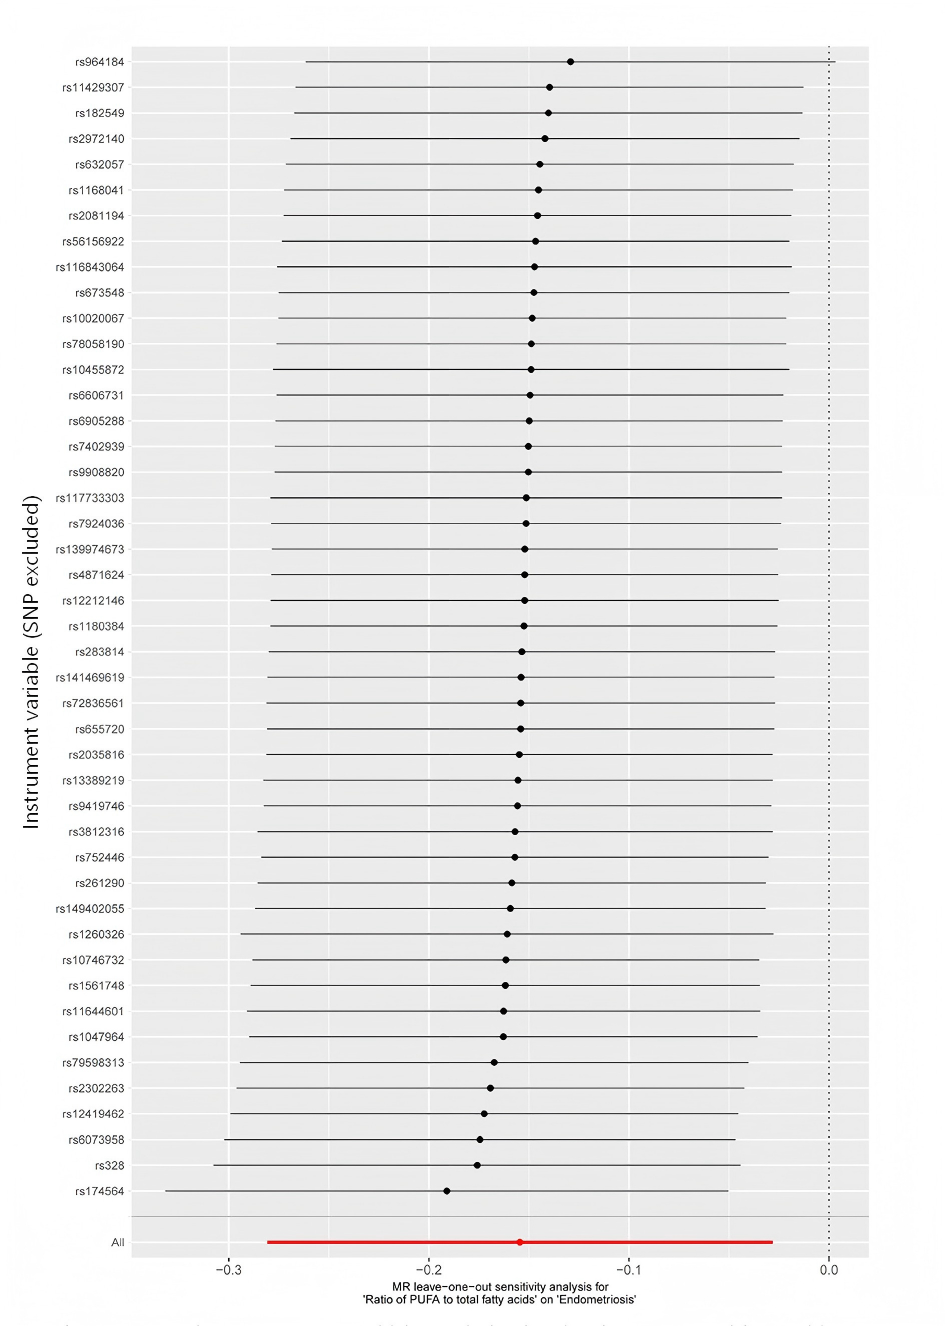


Figure S3 MR leave-one-out sensitivity analysis of Ratio of PUFA to total fatty acids to Endometriosis

Each black dot represents the pooled causal estimate (IVW method) after removing one SNP, with horizontal lines indicating 95% confidence intervals. The red line ("All") denotes the overall causal estimate using all instrumental variables. The dashed vertical line at 0 indicates no effect.


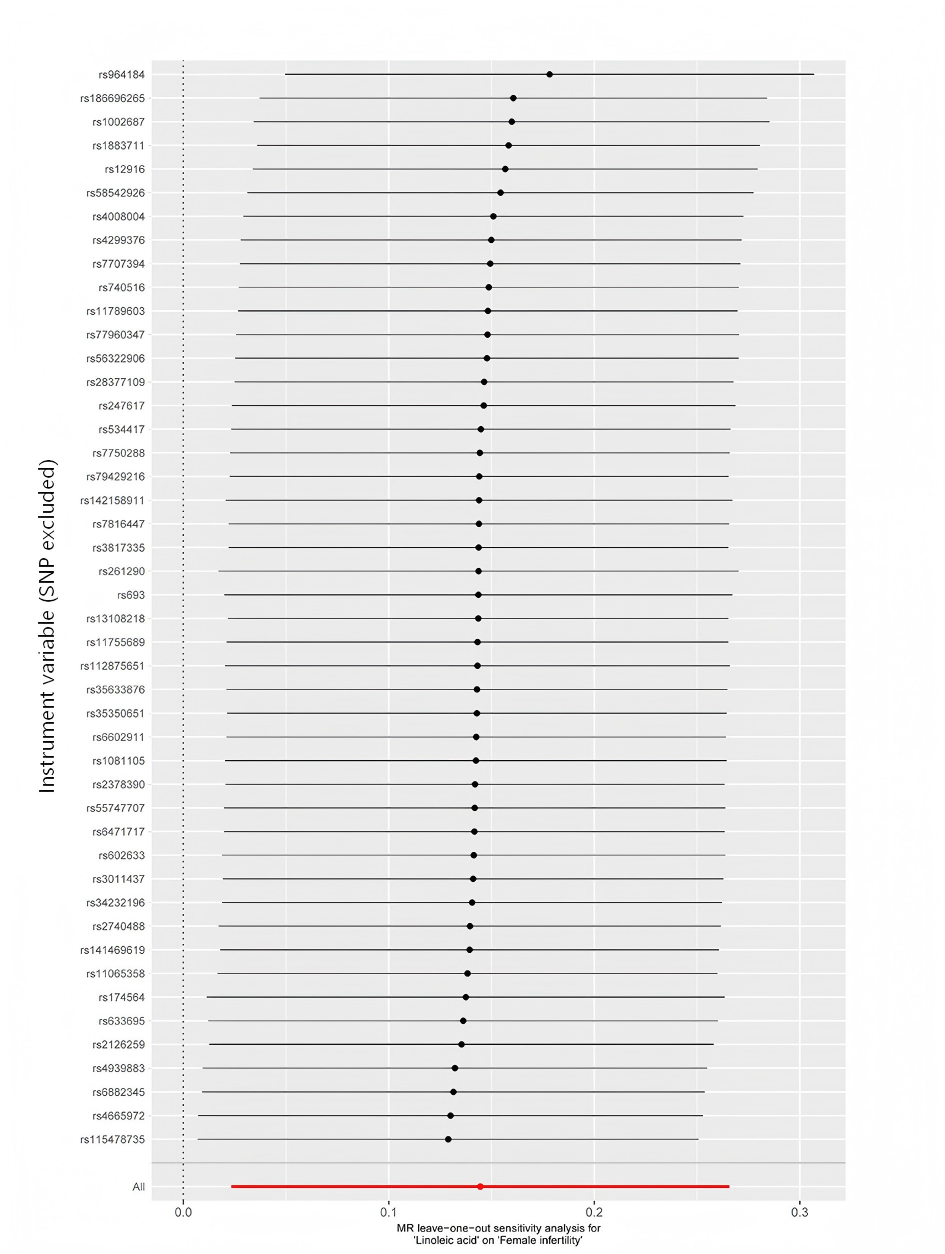


Figure S4 MR leave-one-out sensitivity analysis of Linoleic acid to Female infertility

Each black dot represents the pooled causal estimate (IVW method) after removing one SNP, with horizontal lines indicating 95% confidence intervals. The red line ("All") denotes the overall causal estimate using all instrumental variables. The dashed vertical line at 0 indicates no effect.


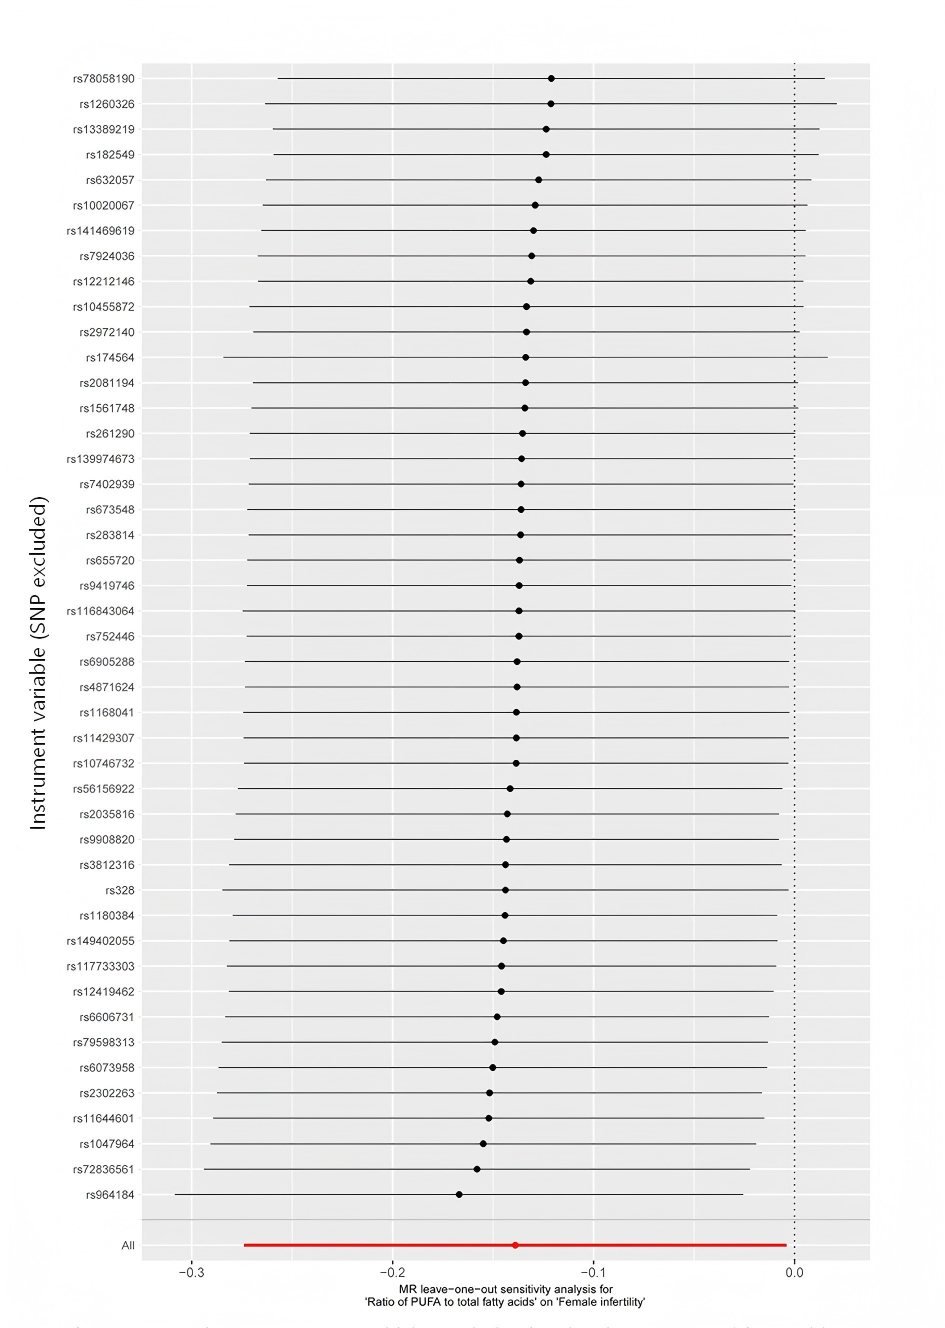


Figure S5 MR leave-one-out sensitivity analysis of Ratio of PUFA to total fatty acids to Female infertility

Each black dot represents the pooled causal estimate (IVW method) after removing one SNP, with horizontal lines indicating 95% confidence intervals. The red line ("All") denotes the overall causal estimate using all instrumental variables. The dashed vertical line at 0 indicates no effect.


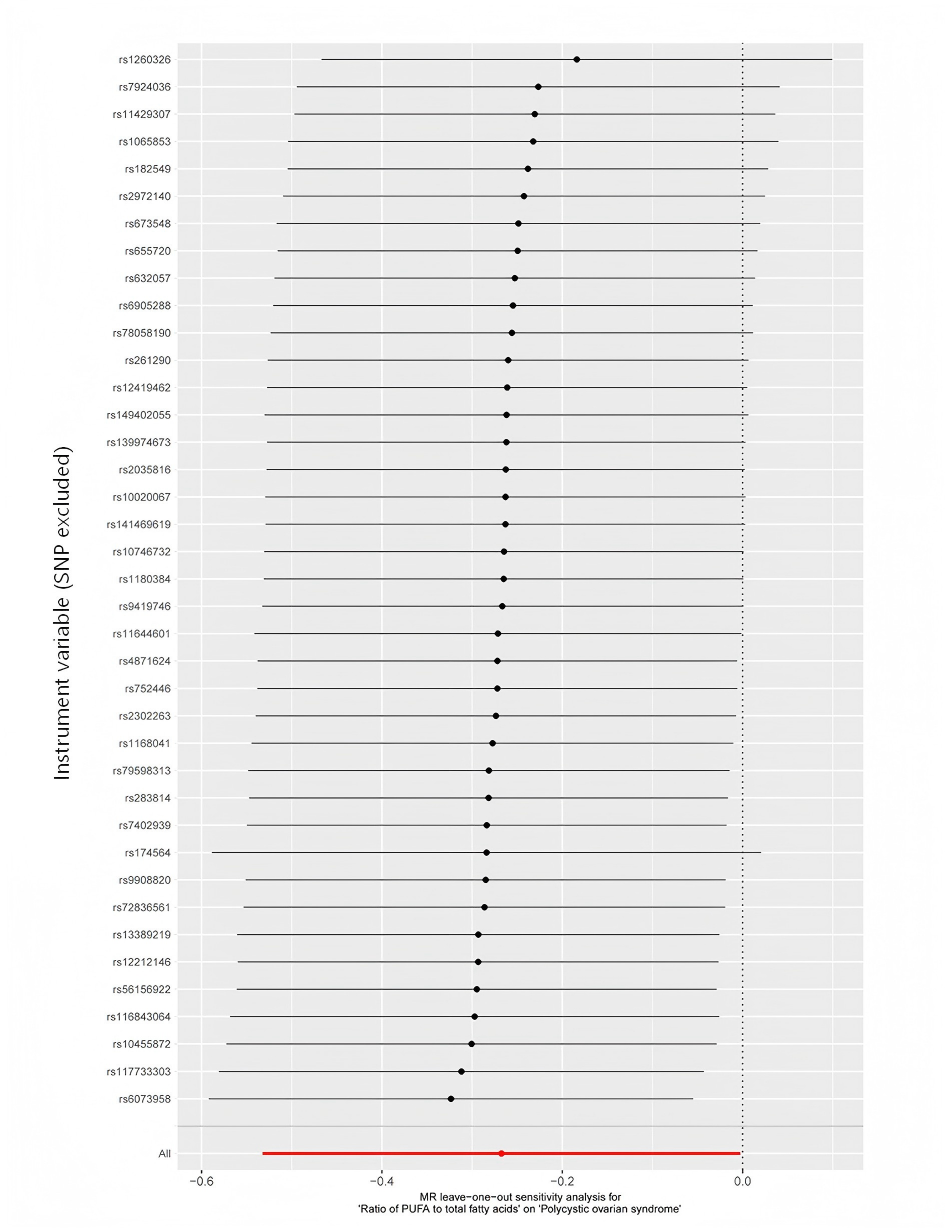


Figure S6 MR leave-one-out sensitivity analysis of Ratio of PUFA to total fatty acids to polycystic ovarian syndrome

Each black dot represents the pooled causal estimate (IVW method) after removing one SNP, with horizontal lines indicating 95% confidence intervals. The red line ("All") denotes the overall causal estimate using all instrumental variables. The dashed vertical line at 0 indicates no effect.

Table S1 The information of exposures traits and outcomes（European）

| Phenotype | Sample size(Case) | GWAS ID | Consortium | PMID |
| --- | --- | --- | --- | --- |
| **Exposures** |  |  |  |  |
| DHA | 115,006 | ebi-a-GCST90092816 |  | 35213538 |
| Linoleic acid | 115,006 | ebi-a-GCST90092880 |  | 35213538 |
| Total omega-3 | 115,006 | ebi-a-GCST90092931 |  | 35213538 |
| Total omega-6 | 115,006 | ebi-a-GCST90092933 |  | 35213538 |
| Ratio of omega-6 to omega- 3 | 115,006 | ebi-a-GCST90092934 |  | 35213538 |
| PUFA | 115,006 | ebi-a-GCST90092939 |  | 35213538 |
| Ratio of PUFA to total fatty acids | 115,006 | ebi-a-GCST90092941 |  | 35213538 |
| **Outcomes** |  |  |  |  |
| Endometriosis | 77,257  (8,288) | finn-b-  N14_ENDOMETRIOSIS | MRC-IEU  (FinnGEN) |  |
| Female infertility | 75,450  (6,481) | finn-b- N14_FEMALEINFERT | MRC-IEU  (FinnGEN) |  |
| Polycystic ovarian syndrome | 220,609  (1,639) | E4_PCOS | FinnGEN |  |
| Premenstrual syndrome | 111,878  (295) | N14_PREMENSTSYNDROM | FinnGEN |  |
| Premature ovarian insufficiency | 118,228  (254) | finn-b-E4_OVARFAIL | MRC-IEU  (FinnGEN) |  |

DHA, docosahexaenoic acid; PUFA, polyunsaturated fatty acid; PCOS, polycystic ovary syndrome. Bold text indicates dataset categories, including exposures and outcomes.

**Table S2 The screening procedure of SNP in forward MR**

| Outcome and exposure | Selected SNP  (*P*<5E-08) | Omitted  LD SNP | Drop  palindromic SNP | F-value | R2(%) | MR-PRESSO  Outlier SNP | Radial MR  Outlier SNP |
| --- | --- | --- | --- | --- | --- | --- | --- |
| **Endometriosis** |  |  |  |  |  |  |  |
| DHA | 9,078 | 46 | 43 | 111 | 4.14 | NA | NA |
| Linoleic acid | 12,255 | 55 | 46 | 118 | 5.12 | NA | rs115478735 |
| Total omega-3 | 13,107 | 55 | 49 | 139 | 6.16 | NA | NA |
| Total omega-6 | 13,880 | 64 | 57 | 110 | 5.64 | NA | rs115478735 |
| Ratio of omega-6 to omega- 3 | 9,548 | 65 | 55 | 153 | 4.25 | NA | NA |
| PUFA | 15,329 | 35 | 30 | 137 | 6.64 | NA | rs115478735 |
| Ratio of PUFA to total fatty acids | 5,375 | 50 | 45 | 111 | 4.64 | NA | NA |
| **Female infertility** |  |  |  |  |  |  |  |
| DHA | 9,078 | 46 | 43 | 111 | 4.14 | NA | NA |
| Linoleic acid | 12,255 | 55 | 46 | 118 | 5.12 | NA | NA |
| Total omega-3 | 13,107 | 55 | 49 | 139 | 6.16 | NA | NA |
| Total omega-6 | 13,880 | 64 | 57 | 110 | 5.64 | NA | NA |
| Ratio of omega-6 to omega- 3 | 9,548 | 65 | 55 | 153 | 4.25 | NA | NA |
| PUFA | 15,329 | 35 | 30 | 137 | 6.64 | NA | NA |
| Ratio of PUFA to total fatty acids | 5,375 | 50 | 45 | 111 | 4.64 | NA | NA |
| **Polycystic ovarian syndrome** |  |  |  |  |  |  |  |
| DHA | 9,078 | 46 | 43 | 121 | 4.09 | NA | NA |
| Linoleic acid | 12,255 | 55 | 46 | 130 | 5.65 | NA | NA |
| Total omega-3 | 13,107 | 55 | 49 | 141 | 6.12 | NA | NA |
| Total omega-6 | 13,880 | 64 | 57 | 123 | 6.20 | NA | NA |
| Ratio of omega-6 to omega- 3 | 9,548 | 65 | 55 | 152 | 4.35 | NA | NA |
| PUFA | 15,329 | 35 | 30 | 149 | 6.79 | NA | NA |
| Ratio of PUFA to total fatty acids | 5,375 | 50 | 45 | 117 | 4.76 | NA | NA |
| **Premenstrual syndrome** |  |  |  |  |  |  |  |
| DHA | 9,078 | 46 | 43 | 121 | 4.09 | NA | NA |
| Linoleic acid | 12,255 | 55 | 46 | 130 | 5.65 | NA | NA |
| Total omega-3 | 13,107 | 55 | 49 | 141 | 6.12 | NA | NA |
| Total omega-6 | 13,880 | 64 | 57 | 123 | 6.20 | NA | NA |
| Ratio of omega-6 to omega- 3 | 9,548 | 65 | 55 | 152 | 4.35 | NA | NA |
| PUFA | 15,329 | 35 | 30 | 149 | 6.79 | NA | NA |
| Ratio of PUFA to total fatty acids | 5,375 | 50 | 45 | 117 | 4.76 | NA | NA |
| **Premature ovarian insufficiency** |  |  |  |  |  |  |  |
| DHA | 9,078 | 46 | 43 | 111 | 4.14 | NA | NA |
| Linoleic acid | 12,255 | 55 | 46 | 118 | 5.12 | NA | NA |
| Total omega-3 | 13,107 | 55 | 49 | 139 | 6.16 | NA | NA |
| Total omega-6 | 13,880 | 64 | 57 | 110 | 5.64 | NA | NA |
| Ratio of omega-6 to omega- 3 | 9,548 | 65 | 55 | 153 | 4.25 | NA | NA |
| PUFA | 15,329 | 35 | 30 | 137 | 6.64 | NA | NA |
| Ratio of PUFA to total fatty acids | 5,375 | 50 | 45 | 111 | 4.64 | NA | NA |

DHA, docosahexaenoic acid; PUFA, polyunsaturated fatty acid; MR, Mendelian randomization; LD, linkage disequilibrium; SNP, single nucleotide polymorphism. Bold text indicates outcome disease categories.

**Table S3 Weighted median and Weighted mode tests in forward MR**

| Variables | nSNPs | Weighted median | | Weighted mode | |
| --- | --- | --- | --- | --- | --- |
| OR (95%CI) | *P* | OR (95%CI) | *P* |
| **Endometriosis** |  |  |  |  |  |
| DHA | 43 | 0.995 (0.886-1.118) | 0.936 | 1.004 (0.899-1.121) | 0.947 |
| Linoleic acid | 46 | 1.135 (0.966-1.334) | 0.123 | 1.140 (0.937-1.387) | 0.198 |
| Total omega-3 | 49 | 1.011 (0.912-1.120) | 0.838 | 1.026 (0.936-1.124) | 0.593 |
| Total omega-6 | 57 | 1.164 (0.990-1.369) | 0.067 | 1.170 (0.950-1.442) | 0.146 |
| Ratio of omega-6 to omega- 3 | 55 | 0.993 (0.907-1.087 | 0.885 | 0.978 (0.897-1.066) | 0.616 |
| PUFA | 30 | 1.136 (0.991-1.302) | 0.068 | 1.128 (0.950-1.340) | 0.175 |
| Ratio of PUFA to total fatty acids | 45 | 0.912 (0.755-1.101) | 0.338 | 0.912 (0.757-1.099) | 0.339 |
| **Female infertility** |  |  |  |  |  |
| DHA | 43 | 0.939 (0.830-1.063) | 0.321 | 0.965 (0.861-1.082) | 0.544 |
| Linoleic acid | 46 | 1.174 (0.982-1.405) | 0.078 | 1.187 (0.935-1.507) | 0.165 |
| Total omega-3 | 49 | 0.945 (0.852-1.047) | 0.281 | 0.967 (0.878-1.066) | 0.508 |
| Total omega-6 | 57 | 1.151 (0.967-1.371) | 0.114 | 1.095 (0.884-1.357) | 0.411 |
| Ratio of omega-6 to omega- 3 | 30 | 1.052 (0.955-1.159) | 0.303 | 1.042 (0.948-1.146) | 0.399 |
| PUFA | 55 | 1.061 (0.900-1.250) | 0.483 | 1.039 (0.862-1.253) | 0.688 |
| Ratio of PUFA to total fatty acids | 45 | 0.850 (0.689-1.048) | 0.128 | 0.854 (0.701-1.041) | 0.125 |
| **Polycystic ovarian syndrome** |  |  |  |  |  |
| DHA | 34 | 0.925 (0.738-1.159) | 0.495 | 0.946 (0.775-1.155) | 0.591 |
| Linoleic acid | 41 | 1.284 (0.915-1.801) | 0.148 | 1.241 (0.740-2.082) | 0.417 |
| Total omega-3 | 43 | 0.959 (0.795-1.155) | 0.657 | 0.977 (0.808-1.182) | 0.812 |
| Total omega-6 | 49 | 1.189 (0.847-1.669) | 0.316 | 1.214 (0.744-1.980) | 0.441 |
| Ratio of omega-6 to omega- 3 | 27 | 1.044 (0.879-1.240) | 0.621 | 1.044 (0.885-1.231) | 0.615 |
| PUFA | 48 | 1.087 (0.799-1.479) | 0.595 | 1.056 (0.724-1.538) | 0.780 |
| Ratio of PUFA to total fatty acids | 39 | 0.771 (0.498-1.192) | 0.242 | 0.695 (0.1-1.096) | 0.126 |
| **Premenstrual syndrome** |  |  |  |  |  |
| DHA | 34 | 1.173 (0.725-1.898) | 0.516 | 1.134 (0.712-1.806) | 0.600 |
| Linoleic acid | 41 | 0.766 (0.387-1.516) | 0.444 | 0.784 (0.319-1.926) | 0.598 |
| Total omega-3 | 43 | 1.148 (0.763-1.730) | 0.508 | 1.142 (0.782-1.666) | 0.497 |
| Total omega-6 | 49 | 1.090 (0.540-2.203) | 0.810 | 1.032 (0.472-2.257) | 0.938 |
| Ratio of omega-6 to omega- 3 | 27 | 0.882 (0.603-1.290) | 0.517 | 0.879 (0.589-1.311) | 0.532 |
| PUFA | 48 | 1.127 (0.598-2.122) | 0.712 | 1.089 (0.569-2.085) | 0.798 |
| Ratio of PUFA to total fatty acids | 39 | 1.156 (0.486-2.748) | 0.743 | 1.300 (0.549-3.080) | 0.555 |
| **Premature ovarian insufficiency** |  |  |  |  |  |
| DHA | 43 | 0.744 (0.414-1.338) | 0.324 | 0.734 (0.413-1.305) | 0.298 |
| Linoleic acid | 46 | 1.105 (0.474-2.578) | 0.817 | 1.087 (0.382-3.096) | 0.877 |
| Total omega-3 | 49 | 0.788 (0.476-1.305) | 0.354 | 0.789 (0.493-1.265) | 0.330 |
| Total omega-6 | 57 | 1.084 (0.470-2.500) | 0.850 | 0.859 (0.310-2.377) | 0.770 |
| Ratio of omega-6 to omega- 3 | 30 | 1.242 (0.787-1.957) | 0.352 | 1.222 (0.800-1.868) | 0.362 |
| PUFA | 55 | 0.964 (0.460-2.020) | 0.92 | 0.792 (0.311-2.017) | 0.626 |
| Ratio of PUFA to total fatty acids | 45 | 0.746 (0.283-1.969) | 0.554 | 0.728 (0.299-1.775 | 0.489 |

DHA, docosahexaenoic acid; PUFA, polyunsaturated fatty acid; MR, Mendelian randomization; SNP, single nucleotide polymorphism; OR, odds ratio; CI, confidence interval. Bold text indicates outcome disease categories.

**Table S4 The pleiotropic and heterogeneity test in reverse MR**

| Outcome and exposure | Horizontal pleiotropic test | | Heterogeneity test | | | |
| --- | --- | --- | --- | --- | --- | --- |
| Egger  intercept | *P* | MR Egger Q | *P* | IVW  Q | *P* |
| **PUFA** |  |  |  |  |  |  |
| Endometriosis | 0.000 | 0.931 | 9.163 | 0.422 | 9.171 | 0.516 |
| Polycystic ovarian syndrome | -0.004 | 0.001 | 113.095 | 1.000 | 123.532 | 1.000 |
| **Ratio of PUFA to total fatty acids** |  |  |  |  |  |  |
| Endometriosis | -0.012 | 0.063 | 12.033 | 0.211 | 18.062 | 0.054 |
| Polycystic ovarian syndrome | 0.008 | 0.000 | 100.464 | 1.000 | 143.629 | 0.998 |
| **Total omega-3** |  |  |  |  |  |  |
| Endometriosis | -0.001 | 0.818 | 13.881 | 0.127 | 13.968 | 0.174 |
| Polycystic ovarian syndrome | -0.001 | 0.351 | 118.476 | 1.000 | 119.352 | 1.000 |
| **DHA** |  |  |  |  |  |  |
| Endometriosis | -0.003 | 0.641 | 17.113 | 0.047 | 17.556 | 0.063 |
| Polycystic ovarian syndrome | 0.002 | 0.182 | 93.750 | 1.000 | 95.542 | 1.000 |
| **Total omega-6** |  |  |  |  |  |  |
| Endometriosis | 0.000 | 0.977 | 10.445 | 0.316 | 10.446 | 0.402 |
| Polycystic ovarian syndrome | -0.005 | 0.000 | 115.572 | 1.000 | 131.031 | 1.000 |
| **Linoleic acid** |  |  |  |  |  |  |
| Endometriosis | 0.000 | 0.989 | 13.947 | 0.124 | 13.947 | 0.175 |
| Polycystic ovarian syndrome | -0.004 | 0.003 | 90.982 | 1.000 | 99.932 | 1.000 |
| **Ratio of omega-6 to omega-3** |  |  |  |  |  |  |
| Endometriosis | 0.002 | 0.823 | 17.207 | 0.046 | 17.309 | 0.068 |
| Polycystic ovarian syndrome | 0.000 | 0.750 | 114.856 | 1.000 | 114.958 | 1.000 |

DHA, docosahexaenoic acid; PUFA, polyunsaturated fatty acid; MR, Mendelian randomization; IVW, inverse-variance weighted. Bold text indicates grouped PUFA-related traits.
